# Supplementary material for: Transient cell-in-cell formation underlies tumor relapse and resistance to immunotherapy
Source: eLife. 2022 Sep 20;11:e80315. doi: 10.7554/eLife.80315 (PMC9489212; doi:10.7554/eLife.80315)
Supplement: Figure 6—source data 2. [file elife-80315-fig6-data2.xlsx]

## Sheet: lyso_tumor common
ensembl_gene_id	gene_symbol	padj_Lyso	log2FoldChange_Lyso	padj_Tumor	log2FoldChange_Tumor
ENSMUSG00000004040	Stat3	4.61e-160	3.31235	6.97e-80	2.38092
ENSMUSG00000038418	Egr1	7.21e-50	4.25033	6.47e-113	6.29657
ENSMUSG00000026821	Ralgds	3.89e-45	2.41219	1.07e-10	1.19463
ENSMUSG00000053113	Socs3	1.16e-42	3.75728	7.94e-40	3.62927
ENSMUSG00000000782	Tcf7	2.12e-36	3.97223	6.68e-08	1.85951
ENSMUSG00000016496	Cd274	2.58e-34	4.85763	9.64e-12	2.8266
ENSMUSG00000021250	Fos	4.92e-33	2.10074	0	6.70805
ENSMUSG00000038393	Txnip	3.75e-29	1.98775	3.92e-13	1.34228
ENSMUSG00000030157	Clec2d	5.78e-26	5.29616	0.00547314	1.79577
ENSMUSG00000038058	Nod1	2.71e-25	4.78726	1.6e-16	3.896
ENSMUSG00000110588	Gm45774	2.83e-25	1.45913	9.55e-17	1.1866
ENSMUSG00000044786	Zfp36	9.71e-24	2.99742	1.82e-49	4.27223
ENSMUSG00000038213	Tapbpl	6.32e-23	3.62393	0.0125534	1.12896
ENSMUSG00000091191	Gm17334	1.05e-22	5.68557	1.87e-05	2.73351
ENSMUSG00000073418	C4b	1.05e-22	6.03603	1.33e-57	9.46041
ENSMUSG00000074398	Gm15441	1.18e-22	1.84842	6.01e-10	1.27589
ENSMUSG00000038264	Sema7a	1.37e-22	3.43513	2.48e-09	2.30316
ENSMUSG00000030772	Dkk3	1.72e-21	1.74476	5.2e-33	2.15007
ENSMUSG00000028793	Rnf19b	2.41e-21	2.42409	0.000201299	1.0656
ENSMUSG00000076437	Selenoh	2.11e-18	1.24196	2.92e-29	1.58621
ENSMUSG00000031762	Mt2	8.91e-18	1.48458	4.77e-10	1.1021
ENSMUSG00000054072	Iigp1	3.14e-16	10.9933	1.48e-10	8.66515
ENSMUSG00000028341	Nr4a3	2.96e-15	2.14524	3.74e-41	3.47246
ENSMUSG00000014599	Csf1	2.97e-15	2.39251	0.00253623	1.03612
ENSMUSG00000018899	Irf1	3.96e-15	6.10793	0.000172254	3.13344
ENSMUSG00000042622	Maff	4.72e-15	2.20869	2.02e-34	3.31222
ENSMUSG00000039997	Ifi203	6.18e-15	5.0513	7.3e-19	5.60557
ENSMUSG00000074151	Nlrc5	1.22e-14	6.0148	7.94e-08	4.27332
ENSMUSG00000006517	Mvd	2.41e-14	1.33654	3.59e-08	1.0266
ENSMUSG00000033066	Gas7	2.6e-14	1.67002	1.2e-14	1.68
ENSMUSG00000024339	Tap2	9.55e-14	4.35752	1.08e-10	3.77954
ENSMUSG00000034855	Cxcl10	1.23e-13	4.28024	9.37e-07	2.90958
ENSMUSG00000022508	Bcl6	1.72e-13	2.10329	2.1e-08	1.67806
ENSMUSG00000021583	Erap1	9.33e-13	2.60344	8.61e-05	1.52255
ENSMUSG00000078853	Igtp	1.02e-12	8.021	0.00235325	3.77136
ENSMUSG00000092021	Gbp11	6.36e-12	6.04855	0.045244	2.3562
ENSMUSG00000040690	Col16a1	8.38e-12	1.28734	3.72e-10	1.18718
ENSMUSG00000067212	H2-T23	1.74e-11	4.44286	9.47e-13	4.61847
ENSMUSG00000052837	Junb	1.86e-11	1.57132	2.8e-50	3.24554
ENSMUSG00000041515	Irf8	2.66e-11	9.50036	1.27e-07	7.58081
ENSMUSG00000078920	Ifi47	3.19e-11	6.90777	6.72e-06	4.80567
ENSMUSG00000078921	Tgtp2	5.64e-11	8.91932	6.48e-07	6.84647
ENSMUSG00000045664	Cdc42ep2	6.85e-11	3.71729	0.000957673	2.18422
ENSMUSG00000035356	Nfkbiz	8.28e-11	1.59604	7.47e-80	4.17732
ENSMUSG00000097417		2.62e-10	1.00576	3.73e-27	1.63883
ENSMUSG00000081512	Gm15821	3.09e-10	3.91092	2.21e-07	3.26157
ENSMUSG00000021127	Zfp36l1	3.99e-10	1.13343	3.15e-24	1.74616
ENSMUSG00000040328	Olfr56	8.14e-10	8.28577	7.33e-07	6.74079
ENSMUSG00000037321	Tap1	8.17e-10	4.97193	0.00010777	3.26032
ENSMUSG00000105504	Gbp5	2.8e-09	5.47285	1.83e-05	4.07857
ENSMUSG00000041992	Rapgef5	4.94e-09	3.80229	1.6e-09	3.89865
ENSMUSG00000082292	Gm12250	5.92e-09	9.06969	0.000229784	5.99356
ENSMUSG00000071862	Lrrtm2	7.07e-09	4.10439	1.99e-13	5.00088
ENSMUSG00000079363	Gbp4	7.98e-09	9.22191	6.05e-09	9.0803
ENSMUSG00000017144	Rnd3	8.68e-09	1.40277	1.41e-13	1.74819
ENSMUSG00000000628	Hk2	1.08e-08	1.30088	2.79e-16	1.766
ENSMUSG00000028583	Pdpn	1.37e-08	1.44816	8.76e-09	1.46228
ENSMUSG00000023484	Prph	2.41e-08	4.93588	6.71e-07	4.38141
ENSMUSG00000032596	Uba7	3.03e-08	2.80728	0.0213263	1.36369
ENSMUSG00000070327	Rnf213	3.12e-08	2.34261	0.0307704	1.04588
ENSMUSG00000027514	Zbp1	3.3e-08	6.51501	6.29e-05	4.82498
ENSMUSG00000097194	9330175E14Rik	4.11e-08	5.35931	0.000186865	3.81898
ENSMUSG00000104713	Gbp6	5.25e-08	7.66475	0.00424368	4.37168
ENSMUSG00000073555	Gm4951	5.29e-08	6.97729	3.18e-08	6.93495
ENSMUSG00000063856	Gpx1	8.24e-08	1.44048	5.17e-06	1.223
ENSMUSG00000035208	Slfn8	1.14e-07	5.94751	2.5e-06	5.30724
ENSMUSG00000037940	Inpp4b	1.34e-07	1.00151	8.27e-08	1.03061
ENSMUSG00000033576	Apol6	1.41e-07	5.87461	0.000206157	4.2972
ENSMUSG00000090272	Mndal	1.55e-07	5.39722	3.24e-13	7.04707
ENSMUSG00000004151	Etv1	2.16e-07	1.56543	5.67e-16	2.31958
ENSMUSG00000068606	Gm4841	2.43e-07	8.96352	0.000160793	6.70998
ENSMUSG00000022912	Pros1	3.4e-07	1.04527	3.13e-09	1.19218
ENSMUSG00000043953	Ccrl2	4.93e-07	5.87865	0.000263266	4.47228
ENSMUSG00000078922	Tgtp1	5.88e-07	10.4208	4.99e-05	8.47902
ENSMUSG00000048852	Gm12185	6.11e-07	10.1025	0.00315341	6.35918
ENSMUSG00000034842	Art3	6.42e-07	2.01444	3.55e-10	2.4449
ENSMUSG00000038151	Prdm1	7.29e-07	6.76359	0.000202396	5.29704
ENSMUSG00000090942	F830016B08Rik	7.96e-07	6.97826	0.000914786	5.01546
ENSMUSG00000040276	Pacsin1	1.02e-06	3.25545	0.0429146	1.6691
ENSMUSG00000029298	Gbp9	1.12e-06	5.59158	1.87e-06	5.38144
ENSMUSG00000070427	Il18bp	1.29e-06	3.06239	0.0389896	1.54132
ENSMUSG00000096954		1.75e-06	2.36075	0.0160123	1.38785
ENSMUSG00000074179	Gm10639	2.27e-06	2.6352	0.000610091	2.02739
ENSMUSG00000079197	Psme2	2.9e-06	1.9314	0.00914812	1.16253
ENSMUSG00000022587	Ly6e	4.19e-06	6.00781	9.06e-17	9.8133
ENSMUSG00000067158	Col4a4	4.94e-06	1.21712	0.000141362	1.07926
ENSMUSG00000045294	Insig1	5.03e-06	1.13867	1.95e-10	1.48363
ENSMUSG00000024338	Psmb8	6.08e-06	6.43495	3.76e-10	8.28808
ENSMUSG00000022216	Psme1	6.58e-06	1.60108	0.0026373	1.11394
ENSMUSG00000032011	Thy1	9.29e-06	5.9689	8.45e-18	10.3557
ENSMUSG00000033965	Slc16a2	9.47e-06	3.04307	1.81e-16	5.07323
ENSMUSG00000041571	Selenow	1.11e-05	1.0027	3.16e-22	1.98628
ENSMUSG00000076609	Igkc	1.2e-05	5.72114	3.39e-06	5.84748
ENSMUSG00000029417	Cxcl9	2.35e-05	5.31328	1.03e-14	8.6848
ENSMUSG00000070034	Sp110	2.63e-05	5.20503	2.55e-05	5.0663
ENSMUSG00000032657	Fam189b	3.13e-05	1.99281	0.00418834	1.4961
ENSMUSG00000026656	Fcgr2b	3.79e-05	5.02931	4.86e-12	7.57742
ENSMUSG00000096727	Psmb9	4.27e-05	5.36974	1.2e-05	5.47641
ENSMUSG00000027087	Itgav	4.79e-05	1.11742	0.000153401	1.01625
ENSMUSG00000024427	Spry4	5.29e-05	1.56384	4.32e-06	1.73241
ENSMUSG00000022575	Gsdmd	5.5e-05	2.5575	8.37e-07	2.9599
ENSMUSG00000068245	Phf11d	6.27e-05	3.15237	3.61e-06	3.45797
ENSMUSG00000055172	C1ra	7.39e-05	1.1145	2.72e-42	3.24736
ENSMUSG00000073490	Ifi207	7.89e-05	4.20034	1.13e-10	6.16232
ENSMUSG00000027318	Adam33	8.01e-05	4.33155	0.00114051	3.68142
ENSMUSG00000022504	Ciita	8.83e-05	8.29822	0.00780167	5.82546
ENSMUSG00000027322	Siglec1	0.000111452	2.96088	0.0412687	1.84412
ENSMUSG00000075602	Ly6a	0.000113426	5.25865	8.49e-19	10.4048
ENSMUSG00000037868	Egr2	0.000121562	3.91388	2.09e-11	6.07017
ENSMUSG00000024014	Pim1	0.000122666	1.12111	3.91e-20	2.35299
ENSMUSG00000032515	Csrnp1	0.00014316	1.28012	2.12e-14	2.27908
ENSMUSG00000053175	Bcl3	0.000165197	2.7018	7.4e-09	3.77138
ENSMUSG00000066363	Serpina3f	0.000170055	5.94222	2.16e-05	6.35281
ENSMUSG00000037989	Wnk2	0.00017857	2.59995	0.023565	1.78733
ENSMUSG00000037552	Plekhg2	0.000186453	1.10021	3.21e-06	1.3035
ENSMUSG00000086503	Xist	0.000188599	4.42793	8.55e-14	7.70708
ENSMUSG00000026395	Ptprc	0.000208624	5.20422	5.44e-05	5.41031
ENSMUSG00000022146	Osmr	0.000225713	1.45288	1.7e-08	2.03513
ENSMUSG00000044337	Ackr3	0.000279175	1.41514	2.61e-27	3.56107
ENSMUSG00000021699	Pde4d	0.000306354	1.22114	0.000272751	1.23109
ENSMUSG00000073489	Ifi204	0.000307794	2.79498	5.6e-10	4.26686
ENSMUSG00000024210	Ip6k3	0.00033663	1.71245	0.00390323	1.46641
ENSMUSG00000026489	Coq8a	0.000413083	1.00852	4.31e-28	2.64959
ENSMUSG00000046805	Mpeg1	0.000513171	5.39904	2.03e-07	7.23653
ENSMUSG00000092550	Gm20496	0.000583735	5.47289	2.16e-06	6.83969
ENSMUSG00000019880	Rspo3	0.000633225	3.66491	0.0118621	2.8654
ENSMUSG00000001053	N4bp3	0.000667645	1.18027	7.3e-12	2.10623
ENSMUSG00000030103	Bhlhe40	0.000694879	1.06422	1.36e-18	2.35055
ENSMUSG00000035929	H2-Q4	0.000735723	1.47549	2.47e-15	2.96076
ENSMUSG00000034684	Sema3f	0.0007735	1.97705	0.0044539	1.72103
ENSMUSG00000015312	Gadd45b	0.000971661	1.832	0.0015581	1.70618
ENSMUSG00000034472	Rasd2	0.000994161	1.94294	2.99e-09	3.08728
ENSMUSG00000026536	Ifi211	0.00105814	2.95073	1.07e-06	3.95047
ENSMUSG00000075020	Mir670hg	0.00106935	1.42331	2.31e-06	1.88706
ENSMUSG00000031805	Jak3	0.00109486	1.13108	8.14e-06	1.44546
ENSMUSG00000000732	Icosl	0.00112393	2.75085	1.19e-05	3.41687
ENSMUSG00000076617	Ighm	0.00119174	4.85167	7.61e-05	5.45349
ENSMUSG00000097730	Gm26588	0.00140874	2.3056	0.000225785	2.53992
ENSMUSG00000069892	9930111J21Rik2	0.00142233	5.03272	0.00100099	4.97916
ENSMUSG00000057933	Gsta2	0.00161297	1.69668	0.00631878	1.45021
ENSMUSG00000029322	Plac8	0.00203059	4.57573	6.01e-12	8.49315
ENSMUSG00000003123	Lipe	0.00219529	1.61418	0.0361982	1.21569
ENSMUSG00000037465	Klf10	0.00232602	1.41739	8.32e-05	1.67699
ENSMUSG00000079057	Cyp4v3	0.00240395	1.04676	0.00122281	1.09411
ENSMUSG00000047793	Sned1	0.00246012	1.88202	2.29e-33	5.81974
ENSMUSG00000031610	Scrg1	0.0027409	1.99047	0.0241025	1.61402
ENSMUSG00000060550	H2-Q7	0.0027409	4.65927	1.55e-07	7.01414
ENSMUSG00000031557	Plekha2	0.0027504	1.04038	6.86e-21	2.67386
ENSMUSG00000085023	Gm12744	0.00300664	1.14025	1.97e-05	1.49881
ENSMUSG00000087341	0610040F04Rik	0.00301906	1.17207	3.33e-13	2.41901
ENSMUSG00000017724	Etv4	0.00314861	1.66611	0.000152987	1.9989
ENSMUSG00000021356	Irf4	0.00320365	2.60809	4.58e-06	3.60764
ENSMUSG00000074183	Gsta1	0.00322099	1.43496	0.00240812	1.43022
ENSMUSG00000020363	Gfpt2	0.0033341	1.07057	2.7e-51	4.22737
ENSMUSG00000021998	Lcp1	0.00353897	1.05367	1.59e-08	1.77205
ENSMUSG00000041481	Serpina3g	0.00362722	4.64321	5.37e-07	6.88293
ENSMUSG00000028024	Enpep	0.00380987	1.43656	0.0192502	1.17758
ENSMUSG00000049241	Hcar1	0.0040756	3.71828	0.000709148	4.07231
ENSMUSG00000045282	Tmem86b	0.00512803	1.77493	0.00914812	1.68437
ENSMUSG00000116056	Gm4544	0.00541605	2.421	0.000103715	3.06488
ENSMUSG00000044548	Dact1	0.00704538	1.14861	0.00199943	1.25064
ENSMUSG00000037447	Arid5a	0.00714643	1.35722	1.27e-05	1.91041
ENSMUSG00000033220	Rac2	0.00761019	4.04633	0.0145485	3.65088
ENSMUSG00000037161	Mgarp	0.00771658	2.13395	6.72e-12	4.47676
ENSMUSG00000018819	Lsp1	0.00778798	1.42067	4.94e-19	3.75888
ENSMUSG00000053199	Arhgap20	0.00918176	2.33915	3.49e-07	3.83865
ENSMUSG00000072572	Slc39a2	0.00969582	2.40289	4.28e-06	3.64506
ENSMUSG00000073409	H2-Q6	0.0101716	4.23619	4.28e-09	7.81019
ENSMUSG00000019737	Syne4	0.0102092	2.99413	0.0309424	2.57218
ENSMUSG00000032690	Oas2	0.0105877	2.18263	0.00948249	2.1021
ENSMUSG00000045826	Ptprcap	0.0106043	4.62777	0.0160391	4.28503
ENSMUSG00000101859	Gm29233	0.0107254	1.96608	6.29e-06	2.97516
ENSMUSG00000054435	Gimap4	0.0107644	4.79318	0.0107497	4.60451
ENSMUSG00000009585	Apobec3	0.0121151	3.63585	1.63e-05	5.29745
ENSMUSG00000000682	Cd52	0.0123815	5.1332	0.0409472	4.21485
ENSMUSG00000075010	AW112010	0.0126814	4.41397	0.000870497	5.26426
ENSMUSG00000049612	Omg	0.0127188	3.91207	0.00753073	3.98483
ENSMUSG00000032492	Pth1r	0.0141984	2.64874	0.000123939	3.59693
ENSMUSG00000044254	Pcsk9	0.014347	1.55199	5.82e-09	3.00126
ENSMUSG00000041577	Prelp	0.0149631	1.21005	1.99e-30	4.25436
ENSMUSG00000087109	4930474H06Rik	0.0149868	1.36462	0.0154351	1.33477
ENSMUSG00000097125	Gm26885	0.0162746	1.70461	1.25e-06	2.86592
ENSMUSG00000038642	Ctss	0.0163844	4.13126	2.16e-08	7.67078
ENSMUSG00000028789	Azin2	0.0166231	1.33249	0.0118615	1.35646
ENSMUSG00000021453	Gadd45g	0.0168804	1.48072	0.0104087	1.48782
ENSMUSG00000060802	B2m	0.0185218	1.06151	4.13e-07	1.86435
ENSMUSG00000108053	Gm43890	0.0185318	3.9074	0.037652	3.45389
ENSMUSG00000030523	Trpm1	0.0189871	1.7395	0.0258311	1.55114
ENSMUSG00000033538	Casp4	0.0196014	1.80052	0.000207287	2.45861
ENSMUSG00000025887	Casp12	0.0203373	2.54681	3.94e-10	5.35444
ENSMUSG00000073421	H2-Ab1	0.0210058	3.43905	6.19e-09	6.86321
ENSMUSG00000031304	Il2rg	0.0212224	3.7094	0.00035611	4.93599
ENSMUSG00000050232	Cxcr3	0.0219327	1.80804	3.06e-11	4.05765
ENSMUSG00000063286	Gm8995	0.0221825	4.53623	0.00316578	5.22676
ENSMUSG00000111837	Gm47135	0.0223227	2.95465	0.0429146	2.62901
ENSMUSG00000034579	Pla2g3	0.0224913	1.79316	7.62e-05	2.6541
ENSMUSG00000023206	Il15ra	0.0228563	2.30306	1.92e-05	3.60351
ENSMUSG00000028581	Laptm5	0.0252347	3.15013	6.35e-05	4.69078
ENSMUSG00000021904	Sema3g	0.026995	2.52141	0.0325155	2.36223
ENSMUSG00000041112	Elmo1	0.0282791	4.0211	0.000215505	5.67394
ENSMUSG00000029563	Foxp2	0.0283857	1.03564	0.000433459	1.43948
ENSMUSG00000076613	Ighg2b	0.0295349	4.97388	0.00931007	5.3555
ENSMUSG00000042677	Zc3h12a	0.0297708	1.34408	0.00171143	1.70809
ENSMUSG00000100280	Gm28417	0.0299832	1.46875	0.00499025	1.72674
ENSMUSG00000032661	Oas3	0.0301446	3.91381	0.000799855	5.16212
ENSMUSG00000035493	Tgfbi	0.0313415	3.77578	1.25e-07	7.17406
ENSMUSG00000033174	Mgll	0.0332871	1.83322	0.0124173	1.92865
ENSMUSG00000102615	Gm37844	0.0341478	2.79223	1.14e-08	5.76111
ENSMUSG00000079505	Gm11131	0.0342893	1.43821	1.99e-09	3.16771
ENSMUSG00000040152	Thbs1	0.034559	2.07221	0.000200609	3.02348
ENSMUSG00000057346	Apol9a	0.0388615	2.86266	0.00187891	3.67356
ENSMUSG00000020077	Srgn	0.0394474	3.07706	4.72e-05	4.90553
ENSMUSG00000020143	Dock2	0.0402252	3.69296	0.0140434	4.02119
ENSMUSG00000031626	Sorbs2	0.0457448	1.54655	0.0226264	1.63899
ENSMUSG00000068246	Apol9b	0.0483926	2.29701	0.00271954	2.9568
