# Supplementary material for: Transient cell-in-cell formation underlies tumor relapse and resistance to immunotherapy
Source: eLife. 2022 Sep 20;11:e80315. doi: 10.7554/eLife.80315 (PMC9489212; doi:10.7554/eLife.80315)
Supplement: Figure 6—source data 3. [file elife-80315-fig6-data3.xlsx]

## Sheet: Sheet1
ensembl_gene_id	gene_symbol	description	log2FoldChange	padj
ENSMUSG00000031740	Mmp2	matrix metallopeptidase 2	4.32918	6.66056e-43
ENSMUSG00000004040	Stat3	signal transducer and activator of transcription 3	2.40524	5.44064e-36
ENSMUSG00000052684	Jun	jun proto-oncogene	3.46704	1.78973e-33
ENSMUSG00000031502	Col4a1	collagen, type IV, alpha 1	3.62882	2.07927e-24
ENSMUSG00000021250	Fos	FBJ osteosarcoma oncogene	6.69029	2.28033e-24
ENSMUSG00000025746	Il6	interleukin 6	6.19937	9.71155e-22
ENSMUSG00000061353	Cxcl12	chemokine (C-X-C motif) ligand 12	10.0033	1.25135e-21
ENSMUSG00000024014	Pim1	proviral integration site 1	2.35426	1.87056e-21
ENSMUSG00000002900	Lamb1	laminin B1	2.07533	2.91456e-20
ENSMUSG00000031565	Fgfr1	fibroblast growth factor receptor 1	4.50318	4.09114e-20
ENSMUSG00000026193	Fn1	fibronectin 1	3.53141	5.39099e-20
ENSMUSG00000032487	Ptgs2	prostaglandin-endoperoxide synthase 2	10.9561	5.9372e-20
ENSMUSG00000030748	Il4ra	interleukin 4 receptor, alpha	4.80697	7.81152e-20
ENSMUSG00000031503	Col4a2	collagen, type IV, alpha 2	2.91684	3.52722e-19
ENSMUSG00000019846	Lama4	laminin, alpha 4	1.28427	3.83553e-19
ENSMUSG00000022346	Myc	myelocytomatosis oncogene	1.94214	4.3572e-15
ENSMUSG00000078816	Prkcg	protein kinase C, gamma	3.71825	1.76915e-14
ENSMUSG00000004791	Pgf	placental growth factor	3.31243	9.84186e-14
ENSMUSG00000020122	Egfr	epidermal growth factor receptor	9.16621	1.69377e-13
ENSMUSG00000024913	Lrp5	low density lipoprotein receptor-related protein 5	1.24329	3.00351e-13
ENSMUSG00000032440	Tgfbr2	transforming growth factor, beta receptor II	1.62407	4.87721e-13
ENSMUSG00000021756	Il6st	interleukin 6 signal transducer	1.39198	5.55921e-13
ENSMUSG00000026478	Lamc1	laminin, gamma 1	0.89598	1.29583e-12
ENSMUSG00000019899	Lama2	laminin, alpha 2	5.70917	1.86904e-12
ENSMUSG00000028645	Slc2a1	solute carrier family 2 (facilitated glucose transporter), member 1	1.97929	1.08077e-11
ENSMUSG00000029231	Pdgfra	platelet derived growth factor receptor, alpha polypeptide	4.87059	1.19879e-11
ENSMUSG00000020826	Nos2	nitric oxide synthase 2, inducible	8.88337	3.88065e-11
ENSMUSG00000021559	Dapk1	death associated protein kinase 1	7.92265	8.02672e-10
ENSMUSG00000031380	Vegfd	vascular endothelial growth factor D	5.33173	9.20792e-10
ENSMUSG00000034165	Ccnd3	cyclin D3	-1.33986	1.08996e-09
ENSMUSG00000017737	Mmp9	matrix metallopeptidase 9	6.06973	1.2174e-09
ENSMUSG00000021025	Nfkbia	nuclear factor of kappa light polypeptide gene enhancer in B cells inhibitor, alpha	1.64281	1.59818e-09
ENSMUSG00000038668	Lpar1	lysophosphatidic acid receptor 1	8.06815	1.62158e-09
ENSMUSG00000027208	Fgf7	fibroblast growth factor 7	4.34118	1.16556e-08
ENSMUSG00000027684	Mecom	MDS1 and EVI1 complex locus	1.65818	2.67154e-08
ENSMUSG00000039943	Plcb4	phospholipase C, beta 4	0.927968	5.79897e-08
ENSMUSG00000000782	Tcf7	transcription factor 7, T cell specific	1.86085	7.05682e-08
ENSMUSG00000022528	Hes1	hes family bHLH transcription factor 1	2.15909	1.31171e-07
ENSMUSG00000003849	Nqo1	NAD(P)H dehydrogenase, quinone 1	-2.59747	1.75237e-07
ENSMUSG00000020053	Igf1	insulin-like growth factor 1	6.66061	1.83481e-07
ENSMUSG00000001552	Jup	junction plakoglobin	1.77024	1.92212e-07
ENSMUSG00000021253	Tgfb3	transforming growth factor, beta 3	-1.15618	1.98205e-06
ENSMUSG00000026821	Ralgds	ral guanine nucleotide dissociation stimulator	1.18044	2.88844e-06
ENSMUSG00000027523	Gnas	GNAS (guanine nucleotide binding protein, alpha stimulating) complex locus	0.526432	2.95372e-06
ENSMUSG00000048376	F2r	coagulation factor II (thrombin) receptor	6.71948	3.82077e-06
ENSMUSG00000005533	Igf1r	insulin-like growth factor I receptor	1.39021	9.52533e-06
ENSMUSG00000057897	Camk2b	calcium/calmodulin-dependent protein kinase II, beta	3.33905	1.3575e-05
ENSMUSG00000010797	Wnt2	wingless-type MMTV integration site family, member 2	6.49482	1.35858e-05
ENSMUSG00000032000	Birc3	baculoviral IAP repeat-containing 3	1.90366	1.68128e-05
ENSMUSG00000025499	Hras	Harvey rat sarcoma virus oncogene	-0.907162	1.80793e-05
ENSMUSG00000036402	Gng12	guanine nucleotide binding protein (G protein), gamma 12	0.75323	3.11431e-05
ENSMUSG00000024960	Plcb3	phospholipase C, beta 3	-0.571926	3.50838e-05
ENSMUSG00000031805	Jak3	Janus kinase 3	1.45035	4.57967e-05
ENSMUSG00000000811	Txnrd3	thioredoxin reductase 3	0.662868	4.908e-05
ENSMUSG00000017057	Il13ra1	interleukin 13 receptor, alpha 1	1.64337	5.6736e-05
ENSMUSG00000024620	Pdgfrb	platelet derived growth factor receptor, beta polypeptide	1.53391	0.000100043
ENSMUSG00000031987	Egln1	egl-9 family hypoxia-inducible factor 1	1.79347	0.000110601
ENSMUSG00000003873	Bax	BCL2-associated X protein	-0.78965	0.000117443
ENSMUSG00000030201	Lrp6	low density lipoprotein receptor-related protein 6	0.623726	0.00011932
ENSMUSG00000021109	Hif1a	hypoxia inducible factor 1, alpha subunit	0.651184	0.00013068
ENSMUSG00000020357	Flt4	FMS-like tyrosine kinase 4	3.04875	0.000146332
ENSMUSG00000023206	Il15ra	interleukin 15 receptor, alpha chain	3.5878	0.000152983
ENSMUSG00000025934	Gsta3	glutathione S-transferase, alpha 3	-3.85463	0.000293317
ENSMUSG00000015522	Arnt	aryl hydrocarbon receptor nuclear translocator	0.587373	0.000341982
ENSMUSG00000037225	Fgf2	fibroblast growth factor 2	1.64201	0.000347081
ENSMUSG00000021994	Wnt5a	wingless-type MMTV integration site family, member 5A	5.97995	0.000408716
ENSMUSG00000031616	Ednra	endothelin receptor type A	5.87638	0.000423593
ENSMUSG00000049115	Agtr1a	angiotensin II receptor, type 1a	5.85184	0.000616809
ENSMUSG00000035158	Mitf	melanogenesis associated transcription factor	1.00359	0.000662471
ENSMUSG00000022521	Crebbp	CREB binding protein	0.828023	0.000727052
ENSMUSG00000047604	Frat2	frequently rearranged in advanced T cell lymphomas 2	3.19505	0.0010158
ENSMUSG00000020611	Gna13	guanine nucleotide binding protein, alpha 13	0.464259	0.00115075
ENSMUSG00000016933	Plcg1	phospholipase C, gamma 1	0.687171	0.00122503
ENSMUSG00000031304	Il2rg	interleukin 2 receptor, gamma chain	4.92275	0.00131031
ENSMUSG00000027087	Itgav	integrin alpha V	1.02167	0.00169487
ENSMUSG00000017776	Crk	v-crk avian sarcoma virus CT10 oncogene homolog	-0.414764	0.00199317
ENSMUSG00000034957	Cebpa	CCAAT/enhancer binding protein (C/EBP), alpha	5.68543	0.0020924
ENSMUSG00000021732	Fgf10	fibroblast growth factor 10	3.56448	0.00214366
ENSMUSG00000021466	Ptch1	patched 1	0.753423	0.00221259
ENSMUSG00000022812	Gsk3b	glycogen synthase kinase 3 beta	0.587564	0.00413928
ENSMUSG00000071713	Csf2rb	colony stimulating factor 2 receptor, beta, low-affinity (granulocyte-macrophage)	4.44107	0.00452294
ENSMUSG00000015312	Gadd45b	growth arrest and DNA-damage-inducible 45 beta	1.73028	0.00452455
ENSMUSG00000027985	Lef1	lymphoid enhancer binding factor 1	-3.37149	0.00549844
ENSMUSG00000040760	Appl1	adaptor protein, phosphotyrosine interaction, PH domain and leucine zipper containing 1	0.516372	0.00583762
ENSMUSG00000032744	Heyl	hairy/enhancer-of-split related with YRPW motif-like	5.44234	0.00617593
ENSMUSG00000004221	Ikbkg	inhibitor of kappaB kinase gamma	-0.637836	0.00765626
ENSMUSG00000019768	Esr1	estrogen receptor 1 (alpha)	1.86834	0.00817407
ENSMUSG00000000184	Ccnd2	cyclin D2	-0.80138	0.00895841
ENSMUSG00000075704	Txnrd2	thioredoxin reductase 2	-0.788684	0.00929832
ENSMUSG00000001280	Sp1	trans-acting transcription factor 1	0.34326	0.00934429
ENSMUSG00000068762	Gstm6	glutathione S-transferase, mu 6	-2.46091	0.00937511
ENSMUSG00000037992	Rara	retinoic acid receptor, alpha	0.746139	0.0109939
ENSMUSG00000015533	Itga2	integrin alpha 2	2.55054	0.0124987
ENSMUSG00000030110	Ret	ret proto-oncogene	4.39879	0.013527
ENSMUSG00000071658	Gng3	guanine nucleotide binding protein (G protein), gamma 3	2.60593	0.0139506
ENSMUSG00000025068	Gsto1	glutathione S-transferase omega 1	-0.54547	0.014426
ENSMUSG00000033220	Rac2	Rac family small GTPase 2	3.66225	0.0150333
ENSMUSG00000074183	Gsta1	glutathione S-transferase, alpha 1 (Ya)	1.38272	0.016616
ENSMUSG00000007659	Bcl2l1	BCL2-like 1	-0.68795	0.0172763
ENSMUSG00000054252	Fgfr3	fibroblast growth factor receptor 3	-2.67705	0.0176865
ENSMUSG00000049551	Fzd9	frizzled class receptor 9	1.4297	0.0179975
ENSMUSG00000020250	Txnrd1	thioredoxin reductase 1	-0.601472	0.0186336
ENSMUSG00000020009	Ifngr1	interferon gamma receptor 1	0.602596	0.0191032
ENSMUSG00000005370	Msh6	mutS homolog 6	-0.577099	0.0205192
ENSMUSG00000022840	Adcy5	adenylate cyclase 5	3.25424	0.0211394
ENSMUSG00000038811	Gngt2	guanine nucleotide binding protein (G protein), gamma transducing activity polypeptide 2	2.53285	0.0211906
ENSMUSG00000036904	Fzd8	frizzled class receptor 8	3.75834	0.0213324
ENSMUSG00000024621	Csf1r	colony stimulating factor 1 receptor	0.701335	0.0215205
ENSMUSG00000040274	Cdk6	cyclin-dependent kinase 6	0.929354	0.0234353
ENSMUSG00000001761	Smo	smoothened, frizzled class receptor	-0.296582	0.0252868
ENSMUSG00000015839	Nfe2l2	nuclear factor, erythroid derived 2, like 2	-0.31915	0.0258442
ENSMUSG00000015846	Rxra	retinoid X receptor alpha	-0.517226	0.0259501
ENSMUSG00000019777	Hdac2	histone deacetylase 2	-0.500504	0.0259568
ENSMUSG00000056234	Ncoa4	nuclear receptor coactivator 4	-0.574554	0.0266423
ENSMUSG00000024789	Jak2	Janus kinase 2	0.47274	0.0268123
ENSMUSG00000026430	Rassf5	Ras association (RalGDS/AF-6) domain family member 5	1.98607	0.0273488
ENSMUSG00000055024	Ep300	E1A binding protein p300	0.439728	0.0279176
ENSMUSG00000021453	Gadd45g	growth arrest and DNA-damage-inducible 45 gamma	1.5359	0.0279531
ENSMUSG00000022220	Adcy4	adenylate cyclase 4	4.82952	0.0280293
ENSMUSG00000017716	Birc5	baculoviral IAP repeat-containing 5	-0.672328	0.029489
ENSMUSG00000002068	Ccne1	cyclin E1	-0.695832	0.0296547
ENSMUSG00000028864	Hgf	hepatocyte growth factor	5.04534	0.0311147
ENSMUSG00000074179	Gm10639	predicted gene 10639	1.85589	0.0319226
ENSMUSG00000028212	Ccne2	cyclin E2	-1.01868	0.0329246
ENSMUSG00000022757	Tfg	Trk-fused gene	0.273411	0.0334942
ENSMUSG00000035105	Egln3	egl-9 family hypoxia-inducible factor 3	1.63009	0.0376876
ENSMUSG00000028681	Ptch2	patched 2	3.26125	0.0385865
ENSMUSG00000055799	Tcf7l1	transcription factor 7 like 1 (T cell specific, HMG box)	0.704265	0.0406163
ENSMUSG00000034781	Gna11	guanine nucleotide binding protein, alpha 11	-0.451928	0.041368
ENSMUSG00000001127	Araf	Araf proto-oncogene, serine/threonine kinase	-0.394375	0.0442381
ENSMUSG00000024778	Fas	Fas (TNF receptor superfamily member 6)	3.1527	0.0443305
ENSMUSG00000048701	Ccdc6	coiled-coil domain containing 6	0.385899	0.0447513
ENSMUSG00000043004	Gng2	guanine nucleotide binding protein (G protein), gamma 2	0.883678	0.0452872
ENSMUSG00000071042	Rasgrp3	RAS, guanyl releasing protein 3	0.88776	0.0467873
ENSMUSG00000023067	Cdkn1a	cyclin-dependent kinase inhibitor 1A (P21)	-1.05326	0.0521982
ENSMUSG00000022994	Adcy6	adenylate cyclase 6	0.514011	0.052752
ENSMUSG00000027111	Itga6	integrin alpha 6	-0.942887	0.0534015
ENSMUSG00000039239	Tgfb2	transforming growth factor, beta 2	0.680946	0.0558517
ENSMUSG00000027314	Dll4	delta like canonical Notch ligand 4	2.8821	0.0600147
ENSMUSG00000049929	Lpar4	lysophosphatidic acid receptor 4	2.34977	0.0602421
ENSMUSG00000034342	Cbl	Casitas B-lineage lymphoma	0.365067	0.061584
ENSMUSG00000034974	Dapk3	death-associated protein kinase 3	-0.373848	0.061584
ENSMUSG00000032624	Eml4	echinoderm microtubule associated protein like 4	0.396916	0.063278
ENSMUSG00000019789	Hey2	hairy/enhancer-of-split related with YRPW motif 2	2.02875	0.0641818
ENSMUSG00000063594	Gng8	guanine nucleotide binding protein (G protein), gamma 8	-1.65887	0.0682401
ENSMUSG00000007613	Tgfbr1	transforming growth factor, beta receptor I	0.424429	0.0700265
ENSMUSG00000015468	Notch4	notch 4	2.25413	0.0746732
ENSMUSG00000071714	Csf2rb2	colony stimulating factor 2 receptor, beta 2, low-affinity (granulocyte-macrophage)	4.52937	0.0774635
ENSMUSG00000024515	Smad4	SMAD family member 4	0.457684	0.0793454
ENSMUSG00000018983	E2f2	E2F transcription factor 2	-0.676573	0.0798478
ENSMUSG00000041347	Bdkrb1	bradykinin receptor, beta 1	3.9071	0.0802741
ENSMUSG00000020828	Pld2	phospholipase D2	2.07252	0.0812
ENSMUSG00000054115	Skp2	S-phase kinase-associated protein 2 (p45)	-0.650896	0.082836
ENSMUSG00000019464	Ptger1	prostaglandin E receptor 1 (subtype EP1)	0.590767	0.0834503
ENSMUSG00000009376	Met	met proto-oncogene	0.540799	0.0844106
ENSMUSG00000067158	Col4a4	collagen, type IV, alpha 4	1.09924	0.0848661
ENSMUSG00000014850	Msh3	mutS homolog 3	0.65942	0.0875239
ENSMUSG00000050288	Fzd2	frizzled class receptor 2	-0.628681	0.0920648
ENSMUSG00000039936	Pik3cd	phosphatidylinositol-4,5-bisphosphate 3-kinase catalytic subunit delta	0.477063	0.0969754
ENSMUSG00000027947	Il6ra	interleukin 6 receptor, alpha	1.8856	0.0975871
ENSMUSG00000031861	Lpar2	lysophosphatidic acid receptor 2	0.848533	0.0988489
ENSMUSG00000057367	Birc2	baculoviral IAP repeat-containing 2	0.568486	0.100524
ENSMUSG00000040329	Il7	interleukin 7	3.39844	0.10667
ENSMUSG00000026637	Traf5	TNF receptor-associated factor 5	1.49905	0.107041
ENSMUSG00000028044	Cks1b	CDC28 protein kinase 1b	-0.499347	0.115178
ENSMUSG00000022122	Ednrb	endothelin receptor type B	3.24812	0.115178
ENSMUSG00000026688	Mgst3	microsomal glutathione S-transferase 3	0.856828	0.122406
ENSMUSG00000024241	Sos1	SOS Ras/Rac guanine nucleotide exchange factor 1	-0.335183	0.125557
ENSMUSG00000027878	Notch2	notch 2	0.475684	0.132761
ENSMUSG00000002603	Tgfb1	transforming growth factor, beta 1	1.00014	0.140126
ENSMUSG00000025856	Pdgfa	platelet derived growth factor, alpha	-1.03689	0.140943
ENSMUSG00000038155	Gstp2	glutathione S-transferase, pi 2	0.875456	0.141455
ENSMUSG00000032035	Ets1	E26 avian leukemia oncogene 1, 5' domain	0.318619	0.143884
ENSMUSG00000023951	Vegfa	vascular endothelial growth factor A	1.86881	0.144014
ENSMUSG00000055839	Elob	elongin B	-0.246602	0.147647
ENSMUSG00000067714	Lpar5	lysophosphatidic acid receptor 5	0.708457	0.149667
ENSMUSG00000063694	Cycs	cytochrome c, somatic	-0.291062	0.149738
ENSMUSG00000025358	Cdk2	cyclin-dependent kinase 2	0.478953	0.15071
ENSMUSG00000035027	Map2k2	mitogen-activated protein kinase kinase 2	-0.2758	0.152505
ENSMUSG00000005413	Hmox1	heme oxygenase 1	-1.62411	0.162124
ENSMUSG00000024231	Cul2	cullin 2	-0.311119	0.164242
ENSMUSG00000016477	E2f3	E2F transcription factor 3	0.260895	0.164776
ENSMUSG00000021668	Polk	polymerase (DNA directed), kappa	-0.681518	0.165379
ENSMUSG00000070348	Ccnd1	cyclin D1	-0.707535	0.167509
ENSMUSG00000018341	Il12rb2	interleukin 12 receptor, beta 2	-1.62687	0.172453
ENSMUSG00000111709	Gm3776	predicted gene 3776	0.918485	0.174622
ENSMUSG00000057614	Gnai1	guanine nucleotide binding protein (G protein), alpha inhibiting 1	2.2092	0.177573
ENSMUSG00000041977	Arhgef11	Rho guanine nucleotide exchange factor (GEF) 11	0.415448	0.178313
ENSMUSG00000022952	Runx1	runt related transcription factor 1	0.768542	0.181285
ENSMUSG00000027323	Rad51	RAD51 recombinase	-0.36188	0.18361
ENSMUSG00000031274	Col4a5	collagen, type IV, alpha 5	-0.905973	0.186756
ENSMUSG00000006005	Tpr	translocated promoter region, nuclear basket protein	0.221682	0.191912
ENSMUSG00000004043	Stat5a	signal transducer and activator of transcription 5A	0.374842	0.193661
ENSMUSG00000057933	Gsta2	glutathione S-transferase, alpha 2 (Yc2)	1.37207	0.196836
ENSMUSG00000057329	Bcl2	B cell leukemia/lymphoma 2	-0.574224	0.19763
ENSMUSG00000026029	Casp8	caspase 8	-0.248158	0.199629
ENSMUSG00000028914	Casp9	caspase 9	0.420894	0.200773
ENSMUSG00000079658	Eloc	elongin C	-0.304909	0.208199
ENSMUSG00000001663	Gstt1	glutathione S-transferase, theta 1	1.79919	0.21344
ENSMUSG00000027381	Bcl2l11	BCL2-like 11 (apoptosis facilitator)	0.5441	0.215289
ENSMUSG00000028163	Nfkb1	nuclear factor of kappa light polypeptide gene enhancer in B cells 1, p105	-0.241147	0.215722
ENSMUSG00000040061	Plcb2	phospholipase C, beta 2	1.66114	0.219488
ENSMUSG00000020184	Mdm2	transformed mouse 3T3 cell double minute 2	-0.558744	0.225924
ENSMUSG00000020135	Apc2	APC regulator of WNT signaling pathway 2	-1.97685	0.22689
ENSMUSG00000034330	Plcg2	phospholipase C, gamma 2	0.428924	0.230919
ENSMUSG00000002111	Spi1	spleen focus forming virus (SFFV) proviral integration oncogene	1.70015	0.232581
ENSMUSG00000000126	Wnt9a	wingless-type MMTV integration site family, member 9A	-1.18367	0.233646
ENSMUSG00000041147	Brca2	breast cancer 2, early onset	0.331187	0.236191
ENSMUSG00000030970	Ctbp2	C-terminal binding protein 2	0.232493	0.241505
ENSMUSG00000024096	Ralbp1	ralA binding protein 1	-0.263803	0.242002
ENSMUSG00000031628	Casp3	caspase 3	0.27134	0.243086
ENSMUSG00000021936	Mapk8	mitogen-activated protein kinase 8	0.313341	0.251024
ENSMUSG00000030827	Fgf21	fibroblast growth factor 21	7.36629	0.254259
ENSMUSG00000004056	Akt2	thymoma viral proto-oncogene 2	0.226105	0.256253
ENSMUSG00000022971	Ifnar2	interferon (alpha and beta) receptor 2	0.349817	0.260172
ENSMUSG00000001847	Rac1	Rac family small GTPase 1	0.192566	0.262367
ENSMUSG00000005672	Kit	KIT proto-oncogene receptor tyrosine kinase	1.56477	0.268043
ENSMUSG00000027715	Ccna2	cyclin A2	-0.398007	0.270331
ENSMUSG00000024140	Epas1	endothelial PAS domain protein 1	0.451023	0.275943
ENSMUSG00000033446	Lpar6	lysophosphatidic acid receptor 6	-0.631915	0.276169
ENSMUSG00000002147	Stat6	signal transducer and activator of transcription 6	0.340944	0.277126
ENSMUSG00000025076	Casp7	caspase 7	0.720076	0.278391
ENSMUSG00000030265	Kras	Kirsten rat sarcoma viral oncogene homolog	-0.190181	0.283909
ENSMUSG00000006932	Ctnnb1	catenin (cadherin associated protein), beta 1	0.260267	0.285178
ENSMUSG00000023944	Hsp90ab1	heat shock protein 90 alpha (cytosolic), class B member 1	0.297779	0.285444
ENSMUSG00000020366	Mapk9	mitogen-activated protein kinase 9	-0.255504	0.290516
ENSMUSG00000000489	Pdgfb	platelet derived growth factor, B polypeptide	1.74111	0.295783
ENSMUSG00000048240	Gng7	guanine nucleotide binding protein (G protein), gamma 7	-0.346816	0.303492
ENSMUSG00000036390	Gadd45a	growth arrest and DNA-damage-inducible 45 alpha	-1.34808	0.306826
ENSMUSG00000057967	Fgf18	fibroblast growth factor 18	2.10796	0.307915
ENSMUSG00000002799	Jag2	jagged 2	0.531951	0.317653
ENSMUSG00000004936	Map2k1	mitogen-activated protein kinase kinase 1	0.24782	0.322017
ENSMUSG00000027490	E2f1	E2F transcription factor 1	-0.410704	0.331293
ENSMUSG00000027695	Pld1	phospholipase D1	0.325579	0.341708
ENSMUSG00000026942	Traf2	TNF receptor-associated factor 2	-0.285331	0.34197
ENSMUSG00000020647	Ncoa1	nuclear receptor coactivator 1	0.237304	0.347671
ENSMUSG00000032348	Gsta4	glutathione S-transferase, alpha 4	0.93637	0.34842
ENSMUSG00000026875	Traf1	TNF receptor-associated factor 1	1.95998	0.349745
ENSMUSG00000041075	Fzd7	frizzled class receptor 7	-0.28755	0.35041
ENSMUSG00000027669	Gnb4	guanine nucleotide binding protein (G protein), beta 4	-1.08122	0.353548
ENSMUSG00000031834	Pik3r2	phosphoinositide-3-kinase regulatory subunit 2	-0.231345	0.358899
ENSMUSG00000079465	Col4a3	collagen, type IV, alpha 3	1.63865	0.367725
ENSMUSG00000046532	Ar	androgen receptor	6.10182	0.372452
ENSMUSG00000026840	Lamc3	laminin gamma 3	1.98572	0.377193
ENSMUSG00000040033	Stat2	signal transducer and activator of transcription 2	0.626118	0.378751
ENSMUSG00000038146	Notch3	notch 3	0.825025	0.397521
ENSMUSG00000027347	Rasgrp1	RAS guanyl releasing protein 1	2.06562	0.399731
ENSMUSG00000049791	Fzd4	frizzled class receptor 4	0.439684	0.401226
ENSMUSG00000027164	Traf6	TNF receptor-associated factor 6	0.213217	0.401862
ENSMUSG00000032192	Gnb5	guanine nucleotide binding protein (G protein), beta 5	0.312516	0.406219
ENSMUSG00000063358	Mapk1	mitogen-activated protein kinase 1	-0.143265	0.412304
ENSMUSG00000024959	Bad	BCL2-associated agonist of cell death	-0.272346	0.412716
ENSMUSG00000008859	Rala	v-ral simian leukemia viral oncogene A (ras related)	-0.178552	0.416987
ENSMUSG00000074604	Mgst2	microsomal glutathione S-transferase 2	1.81599	0.420199
ENSMUSG00000031712	Il15	interleukin 15	0.802797	0.428088
ENSMUSG00000020654	Adcy3	adenylate cyclase 3	0.28614	0.431285
ENSMUSG00000030589	Rasgrp4	RAS guanyl releasing protein 4	0.596832	0.441724
ENSMUSG00000040940	Arhgef1	Rho guanine nucleotide exchange factor (GEF) 1	0.167629	0.44309
ENSMUSG00000000001	Gnai3	guanine nucleotide binding protein (G protein), alpha inhibiting 3	0.166792	0.44337
ENSMUSG00000058135	Gstm1	glutathione S-transferase, mu 1	-0.518866	0.446949
ENSMUSG00000021318	Gli3	GLI-Kruppel family member GLI3	0.393858	0.447099
ENSMUSG00000019979	Apaf1	apoptotic peptidase activating factor 1	0.218655	0.447441
ENSMUSG00000022297	Fzd6	frizzled class receptor 6	0.212147	0.448572
ENSMUSG00000003308	Keap1	kelch-like ECH-associated protein 1	-0.176822	0.452146
ENSMUSG00000022607	Ptk2	PTK2 protein tyrosine kinase 2	0.166894	0.455628
ENSMUSG00000005034	Prkacb	protein kinase, cAMP dependent, catalytic, beta	0.148305	0.460432
ENSMUSG00000031659	Adcy7	adenylate cyclase 7	-0.400405	0.460697
ENSMUSG00000057789	Bak1	BCL2-antagonist/killer 1	-0.254032	0.461569
ENSMUSG00000001729	Akt1	thymoma viral proto-oncogene 1	-0.179935	0.463249
ENSMUSG00000025739	Gng13	guanine nucleotide binding protein (G protein), gamma 13	-0.953493	0.463357
ENSMUSG00000025069	Gsto2	glutathione S-transferase omega 2	-1.95893	0.465999
ENSMUSG00000032946	Rasgrp2	RAS, guanyl releasing protein 2	-0.772781	0.46844
ENSMUSG00000006215	Zbtb17	zinc finger and BTB domain containing 17	-0.132902	0.487836
ENSMUSG00000003031	Cdkn1b	cyclin-dependent kinase inhibitor 1B	0.325979	0.490292
ENSMUSG00000001507	Itga3	integrin alpha 3	0.879518	0.495342
ENSMUSG00000031077	Fadd	Fas (TNFRSF6)-associated via death domain	-0.183504	0.496819
ENSMUSG00000040289	Hey1	hairy/enhancer-of-split related with YRPW motif 1	1.67509	0.498346
ENSMUSG00000032246	Calml4	calmodulin-like 4	-0.915	0.499311
ENSMUSG00000019699	Akt3	thymoma viral proto-oncogene 3	0.266529	0.499381
ENSMUSG00000006134	Crkl	v-crk avian sarcoma virus CT10 oncogene homolog-like	-0.157693	0.502889
ENSMUSG00000006728	Cdk4	cyclin-dependent kinase 4	-0.108899	0.50658
ENSMUSG00000062248	Cks2	CDC28 protein kinase regulatory subunit 2	-0.248931	0.50834
ENSMUSG00000036856	Wnt4	wingless-type MMTV integration site family, member 4	-1.58792	0.523691
ENSMUSG00000041417	Pik3r1	phosphoinositide-3-kinase regulatory subunit 1	0.213755	0.532309
ENSMUSG00000022400	Rbx1	ring-box 1	-0.178421	0.546057
ENSMUSG00000021180	Rps6ka5	ribosomal protein S6 kinase, polypeptide 5	0.445021	0.547612
ENSMUSG00000028800	Hdac1	histone deacetylase 1	-0.179294	0.550425
ENSMUSG00000062312	Erbb2	erb-b2 receptor tyrosine kinase 2	-0.244579	0.550626
ENSMUSG00000036438	Calm2	calmodulin 2	-0.200777	0.554304
ENSMUSG00000050965	Prkca	protein kinase C, alpha	0.228854	0.555548
ENSMUSG00000025809	Itgb1	integrin beta 1 (fibronectin receptor beta)	0.162842	0.559548
ENSMUSG00000007989	Fzd3	frizzled class receptor 3	-0.431531	0.56235
ENSMUSG00000058709	Egln2	egl-9 family hypoxia-inducible factor 2	-0.167422	0.564885
ENSMUSG00000060803	Gstp1	glutathione S-transferase, pi 1	-0.259858	0.579093
ENSMUSG00000068523	Gng5	guanine nucleotide binding protein (G protein), gamma 5	-0.184239	0.583571
ENSMUSG00000002109	Ddb2	damage specific DNA binding protein 2	0.281017	0.583852
ENSMUSG00000004032	Gstm5	glutathione S-transferase, mu 5	0.246266	0.595461
ENSMUSG00000033227	Wnt6	wingless-type MMTV integration site family, member 6	0.737125	0.598489
ENSMUSG00000024927	Rela	v-rel reticuloendotheliosis viral oncogene homolog A (avian)	0.192935	0.600657
ENSMUSG00000002413	Braf	Braf transforming gene	0.145379	0.601589
ENSMUSG00000021820	Camk2g	calcium/calmodulin-dependent protein kinase II gamma	-0.158823	0.602353
ENSMUSG00000051177	Plcb1	phospholipase C, beta 1	0.858457	0.607911
ENSMUSG00000059436	Max	Max protein	0.138737	0.609103
ENSMUSG00000027276	Jag1	jagged 1	-0.403039	0.628196
ENSMUSG00000001175	Calm1	calmodulin 1	-0.187258	0.628421
ENSMUSG00000021270	Hsp90aa1	heat shock protein 90, alpha (cytosolic), class A member 1	-0.166401	0.631376
ENSMUSG00000034664	Itga2b	integrin alpha 2b	0.562007	0.6315
ENSMUSG00000030170	Wnt5b	wingless-type MMTV integration site family, member 5B	0.452434	0.641088
ENSMUSG00000020888	Dvl2	dishevelled segment polarity protein 2	-0.119127	0.651101
ENSMUSG00000031520	Vegfc	vascular endothelial growth factor C	0.183034	0.656214
ENSMUSG00000044167	Foxo1	forkhead box O1	0.204421	0.657533
ENSMUSG00000004451	Ralb	v-ral simian leukemia viral oncogene B	-0.102453	0.667119
ENSMUSG00000033318	Gstt2	glutathione S-transferase, theta 2	-0.524248	0.668914
ENSMUSG00000059495	Arhgef12	Rho guanine nucleotide exchange factor (GEF) 12	0.125886	0.670091
ENSMUSG00000059923	Grb2	growth factor receptor bound protein 2	0.131613	0.675917
ENSMUSG00000003233	Dvl3	dishevelled segment polarity protein 3	-0.136553	0.677853
ENSMUSG00000036309	Skp1a	S-phase kinase-associated protein 1A	-0.122758	0.68712
ENSMUSG00000015647	Lama5	laminin, alpha 5	0.319018	0.69359
ENSMUSG00000021303	Gng4	guanine nucleotide binding protein (G protein), gamma 4	-0.56786	0.701221
ENSMUSG00000063065	Mapk3	mitogen-activated protein kinase 3	0.143612	0.701599
ENSMUSG00000110206	Flt3l	FMS-like tyrosine kinase 3 ligand	0.62658	0.704172
ENSMUSG00000009681	Bcr	BCR activator of RhoGEF and GTPase	0.115199	0.705916
ENSMUSG00000022965	Ifngr2	interferon gamma receptor 2	0.152169	0.707969
ENSMUSG00000022105	Rb1	RB transcriptional corepressor 1	-0.226603	0.714684
ENSMUSG00000022967	Ifnar1	interferon (alpha and beta) receptor 1	0.133287	0.716735
ENSMUSG00000033933	Vhl	von Hippel-Lindau tumor suppressor	0.204015	0.722278
ENSMUSG00000028530	Jak1	Janus kinase 1	0.112027	0.722279
ENSMUSG00000000303	Cdh1	cadherin 1	0.446881	0.722648
ENSMUSG00000000791	Il12rb1	interleukin 12 receptor, beta 1	0.456653	0.725551
ENSMUSG00000059326	Csf2ra	colony stimulating factor 2 receptor, alpha, low-affinity (granulocyte-macrophage)	0.278214	0.727821
ENSMUSG00000031980	Agt	angiotensinogen (serpin peptidase inhibitor, clade A, member 8)	0.208788	0.727913
ENSMUSG00000052911	Lamb2	laminin, beta 2	0.164408	0.728526
ENSMUSG00000029713	Gnb2	guanine nucleotide binding protein (G protein), beta 2	-0.0975263	0.729355
ENSMUSG00000025860	Xiap	X-linked inhibitor of apoptosis	-0.0983093	0.730543
ENSMUSG00000021611	Tert	telomerase reverse transcriptase	0.363846	0.738358
ENSMUSG00000020919	Stat5b	signal transducer and activator of transcription 5B	0.128114	0.740946
ENSMUSG00000024151	Msh2	mutS homolog 2	0.108984	0.752094
ENSMUSG00000024962	Vegfb	vascular endothelial growth factor B	0.145507	0.755174
ENSMUSG00000020516	Rps6kb1	ribosomal protein S6 kinase, polypeptide 1	-0.0844945	0.755177
ENSMUSG00000020580	Rock2	Rho-associated coiled-coil containing protein kinase 2	-0.113018	0.76274
ENSMUSG00000025199	Chuk	conserved helix-loop-helix ubiquitous kinase	-0.134198	0.767303
ENSMUSG00000031603	Fgf20	fibroblast growth factor 20	0.435654	0.767834
ENSMUSG00000032766	Gng11	guanine nucleotide binding protein (G protein), gamma 11	0.183727	0.7698
ENSMUSG00000032562	Gnai2	guanine nucleotide binding protein (G protein), alpha inhibiting 2	-0.106802	0.77273
ENSMUSG00000027840	Wnt2b	wingless-type MMTV integration site family, member 2B	0.678819	0.77273
ENSMUSG00000005469	Prkaca	protein kinase, cAMP dependent, catalytic, alpha	-0.0991649	0.772785
ENSMUSG00000009406	Elk1	ELK1, member of ETS oncogene family	-0.106378	0.773055
ENSMUSG00000027940	Tpm3	tropomyosin 3, gamma	0.100871	0.775115
ENSMUSG00000036986	Pml	promyelocytic leukemia	-0.189483	0.776598
ENSMUSG00000018209	Stk4	serine/threonine kinase 4	-0.0661334	0.776598
ENSMUSG00000027890	Gstm4	glutathione S-transferase, mu 4	-0.234708	0.778357
ENSMUSG00000018012	Rac3	Rac family small GTPase 3	0.243878	0.780196
ENSMUSG00000029999	Tgfa	transforming growth factor alpha	-0.532324	0.78144
ENSMUSG00000024290	Rock1	Rho-associated coiled-coil containing protein kinase 1	-0.0841153	0.793741
ENSMUSG00000025383	Il23a	interleukin 23, alpha subunit p19	-0.605503	0.797529
ENSMUSG00000000142	Axin2	axin 2	-0.133308	0.79925
ENSMUSG00000024182	Axin1	axin 1	0.087129	0.809369
ENSMUSG00000019370	Calm3	calmodulin 3	0.056774	0.813462
ENSMUSG00000025407	Gli1	GLI-Kruppel family member GLI1	0.684587	0.81425
ENSMUSG00000059552	Trp53	transformation related protein 53	-0.0649704	0.815571
ENSMUSG00000028698	Pik3r3	phosphoinositide-3-kinase regulatory subunit 3	-0.0846392	0.82944
ENSMUSG00000024639	Gnaq	guanine nucleotide binding protein, alpha q polypeptide	0.0754842	0.830483
ENSMUSG00000010067	Rassf1	Ras association (RalGDS/AF-6) domain family member 1	0.0959207	0.833406
ENSMUSG00000008540	Mgst1	microsomal glutathione S-transferase 1	-0.183692	0.835465
ENSMUSG00000027852	Nras	neuroblastoma ras oncogene	-0.0473155	0.835943
ENSMUSG00000039656	Rxrb	retinoid X receptor beta	0.0686886	0.853509
ENSMUSG00000029071	Dvl1	dishevelled segment polarity protein 1	0.0621233	0.855765
ENSMUSG00000039713	Plekhg5	pleckstrin homology domain containing, family G (with RhoGef domain) member 5	0.0895465	0.858681
ENSMUSG00000032462	Pik3cb	phosphatidylinositol-4,5-bisphosphate 3-kinase catalytic subunit beta	-0.10591	0.862183
ENSMUSG00000020048	Hsp90b1	heat shock protein 90, beta (Grp94), member 1	0.116143	0.864607
ENSMUSG00000027793	Ccna1	cyclin A1	0.510309	0.866784
ENSMUSG00000000149	Gna12	guanine nucleotide binding protein, alpha 12	0.0630287	0.867067
ENSMUSG00000031155	Pim2	proviral integration site 2	-0.107325	0.868119
ENSMUSG00000000869	Il4	interleukin 4	-0.269882	0.869354
ENSMUSG00000038607	Gng10	guanine nucleotide binding protein (G protein), gamma 10	-0.533988	0.870598
ENSMUSG00000026842	Abl1	c-abl oncogene 1, non-receptor tyrosine kinase	-0.0542488	0.871959
ENSMUSG00000040562	Gstm2	glutathione S-transferase, mu 2	-0.0875056	0.872011
ENSMUSG00000024985	Tcf7l2	transcription factor 7 like 2, T cell specific, HMG box	0.103828	0.87223
ENSMUSG00000024563	Smad2	SMAD family member 2	0.0521992	0.880038
ENSMUSG00000024421	Lama3	laminin, alpha 3	-0.422298	0.881283
ENSMUSG00000021277	Traf3	TNF receptor-associated factor 3	-0.0660492	0.882139
ENSMUSG00000015709	Arnt2	aryl hydrocarbon receptor nuclear translocator 2	0.216795	0.889314
ENSMUSG00000039942	Ptger4	prostaglandin E receptor 4 (subtype EP4)	-0.1365	0.889366
ENSMUSG00000068758	Il3ra	interleukin 3 receptor, alpha chain	0.0934978	0.891935
ENSMUSG00000013663	Pten	phosphatase and tensin homolog	-0.057852	0.895054
ENSMUSG00000001665	Gstt3	glutathione S-transferase, theta 3	-0.102104	0.896418
ENSMUSG00000036585	Fgf1	fibroblast growth factor 1	-0.139698	0.897817
ENSMUSG00000029064	Gnb1	guanine nucleotide binding protein (G protein), beta 1	0.0421919	0.903074
ENSMUSG00000068227	Il2rb	interleukin 2 receptor, beta chain	-0.246037	0.904101
ENSMUSG00000019966	Kitl	kit ligand	-0.189477	0.905461
ENSMUSG00000017386	Traf4	TNF receptor associated factor 4	-0.0654501	0.909091
ENSMUSG00000000441	Raf1	v-raf-leukemia viral oncogene 1	0.0267269	0.915521
ENSMUSG00000037815	Ctnna1	catenin (cadherin associated protein), alpha 1	0.0282095	0.916407
ENSMUSG00000006699	Cdc42	cell division cycle 42	-0.0301779	0.916876
ENSMUSG00000021536	Adcy2	adenylate cyclase 2	-0.158732	0.918557
ENSMUSG00000027665	Pik3ca	phosphatidylinositol-4,5-bisphosphate 3-kinase catalytic subunit alpha	-0.0368289	0.925429
ENSMUSG00000027678	Ncoa3	nuclear receptor coactivator 3	-0.0380855	0.929492
ENSMUSG00000026104	Stat1	signal transducer and activator of transcription 1	0.156857	0.934415
ENSMUSG00000025231	Sufu	SUFU negative regulator of hedgehog signaling	0.0285107	0.939492
ENSMUSG00000028991	Mtor	mechanistic target of rapamycin kinase	0.0236928	0.940652
ENSMUSG00000002083	Bbc3	BCL2 binding component 3	-0.069371	0.944765
ENSMUSG00000026526	Fh1	fumarate hydratase 1	-0.0253028	0.951411
ENSMUSG00000067199	Frat1	frequently rearranged in advanced T cell lymphomas	0.201849	0.952508
ENSMUSG00000017491	Rarb	retinoic acid receptor, beta	0.0596003	0.952864
ENSMUSG00000026923	Notch1	notch 1	0.0591243	0.953588
ENSMUSG00000034801	Sos2	SOS Ras/Rho guanine nucleotide exchange factor 2	-0.0307553	0.955145
ENSMUSG00000028017	Egf	epidermal growth factor	0.102703	0.955223
ENSMUSG00000004446	Bid	BH3 interacting domain death agonist	-0.0266052	0.955603
ENSMUSG00000006235	Epor	erythropoietin receptor	0.103002	0.956085
ENSMUSG00000029686	Cul1	cullin 1	0.0161868	0.958034
ENSMUSG00000053819	Camk2d	calcium/calmodulin-dependent protein kinase II, delta	0.0374346	0.958825
ENSMUSG00000037373	Ctbp1	C-terminal binding protein 1	0.0172715	0.959645
ENSMUSG00000024830	Rps6kb2	ribosomal protein S6 kinase, polypeptide 2	-0.0328462	0.960004
ENSMUSG00000045005	Fzd5	frizzled class receptor 5	-0.0310656	0.96194
ENSMUSG00000024617	Camk2a	calcium/calmodulin-dependent protein kinase II alpha	0.112131	0.963663
ENSMUSG00000005580	Adcy9	adenylate cyclase 9	-0.0341218	0.963833
ENSMUSG00000026479	Lamc2	laminin, gamma 2	0.094379	0.969206
ENSMUSG00000031537	Ikbkb	inhibitor of kappaB kinase beta	-0.0147413	0.969737
ENSMUSG00000044674	Fzd1	frizzled class receptor 1	-0.0160394	0.975158
ENSMUSG00000007815	Rhoa	ras homolog family member A	0.0106725	0.980049
ENSMUSG00000032402	Smad3	SMAD family member 3	0.0115046	0.98123
ENSMUSG00000032498	Mlh1	mutL homolog 1	0.00977329	0.982264
ENSMUSG00000005871	Apc	APC, WNT signaling pathway regulator	0.00448266	0.988393
ENSMUSG00000004035	Gstm7	glutathione S-transferase, mu 7	-0.0182099	0.990349
ENSMUSG00000025225	Nfkb2	nuclear factor of kappa light polypeptide gene enhancer in B cells 2, p49/p100	0.00201845	0.996493
ENSMUSG00000050382	Kif7	kinesin family member 7	0.00188792	0.997914
ENSMUSG00000002250	Ppard	peroxisome proliferator activator receptor delta	0.000436045	0.999914
