# Supplementary material for: Transient cell-in-cell formation underlies tumor relapse and resistance to immunotherapy
Source: eLife. 2022 Sep 20;11:e80315. doi: 10.7554/eLife.80315 (PMC9489212; doi:10.7554/eLife.80315)
Supplement: Source data 1. [file elife-80315-data1.xlsx]

## Sheet: RET cells
		Background	0
		RET melanoma cells
			anti-STAT3	anti-Actin			anti-MAPK	anti-Actin			anti-EGR1	anti-Actin
		siCtrl	49.982	72.08		siCtrl	92.926	99.309		siCtrl	7.625	48.496
		siSTAT3	1.728	70.37		siMAPK	41.577	80.536		siEGR1	8.191	59.621
										HeLa positive Ctrl	85.416	29.813
		Normalised to the endogenous control
		siCtrl	0.693424			siCtrl	0.935726			siCtrl	0.157229
		siSTAT3	0.0245559			siMAPK	0.516254			siEGR1	0.137384
										HeLa positive Ctrl	2.86506

## Sheet: B16-F10 cells
		Background	0
		B16-F10 cells
			anti-STAT3	anti-Actin			anti-MAPK	anti-Actin			anti-EGR1	anti-Actin
		siCtrl	67.482	49.135		siCtrl	102.917	61.146		siCtrl	0	56.885
		siSTAT3	9.696	85.001		siMAPK	45.999	83.068		siEGR1	0	57.358
										HeLa positive Ctrl	71.886	60.167
		Normalised to the endogenous control
		siCtrl	1.3734			siCtrl	1.68314			siCtrl	0
		siSTAT3	0.114069			siMAPK	0.553751			siEGR1	0
										HeLa positive Ctrl	1.19477
